# Supplementary material for: Genome Sequencing of Listeria monocytogenes “Quargel” Listeriosis Outbreak Strains Reveals Two Different Strains with Distinct In Vitro Virulence Potential
Source: PubMed Central journal article supplement (PMC3935953; doi:10.1371/journal.pone.0089964), 2014-02-26
Supplement: pone.0089964.s002.pdf [file pone.0089964.s002.pdf]

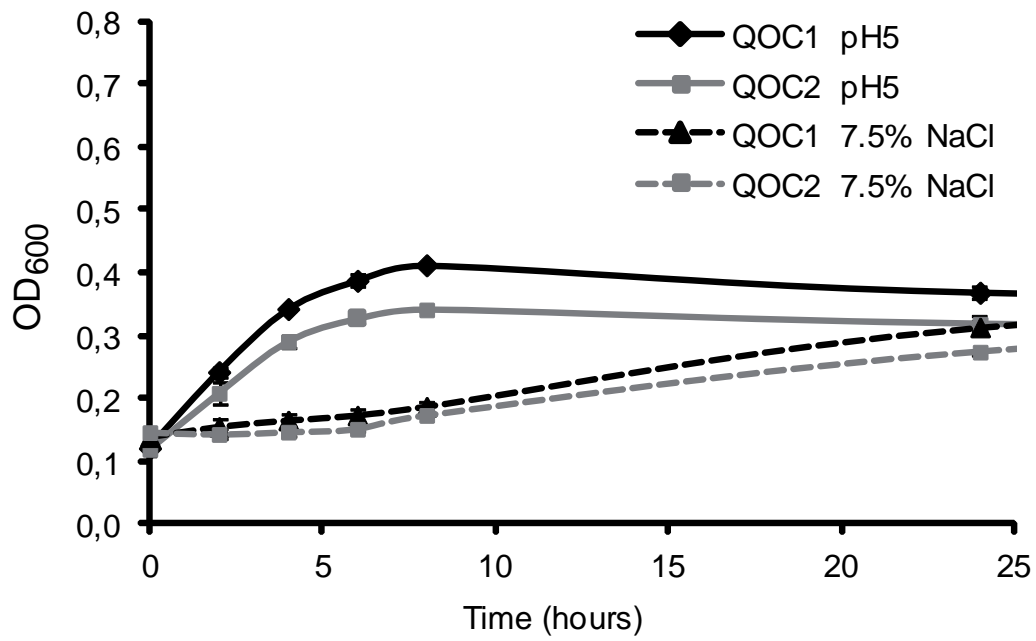

**Figure S2: Growth under stress conditions**

Growth of *L. monocytogenes* QOC1 and QOC2 at 37°C in minimal medium adjusted to pH5 and supplemented with 7.5% NaCl.
