# Supplementary material for: Genome Sequencing of Listeria monocytogenes “Quargel” Listeriosis Outbreak Strains Reveals Two Different Strains with Distinct In Vitro Virulence Potential
Source: PubMed Central journal article supplement (PMC3935953; doi:10.1371/journal.pone.0089964), 2014-02-26
Supplement: pone.0089964.s005.pdf [file pone.0089964.s005.pdf]

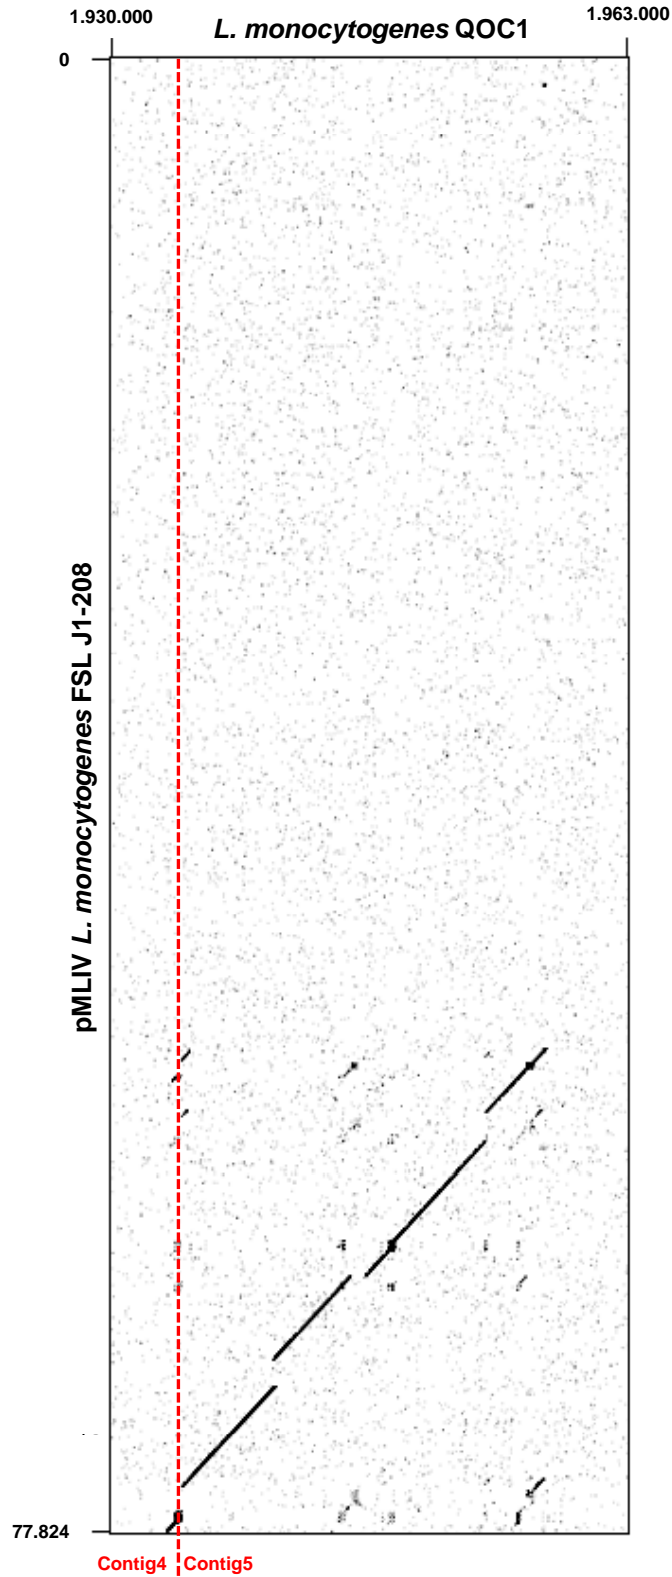

**Figure S5: DNA-based alignment (dotplot) of pLMIV from *L. monocytogenes* FSL J1-208 with the *L. monocytogenes* QOC1 genome.** The dotplot was created using Gepard (Krumisiek et al., Bioinformatics. 2007 Apr 15;23(8):1026-8).
