# Supplementary material for: Genome Sequencing of Listeria monocytogenes “Quargel” Listeriosis Outbreak Strains Reveals Two Different Strains with Distinct In Vitro Virulence Potential
Source: PubMed Central journal article supplement (PMC3935953; doi:10.1371/journal.pone.0089964), 2014-02-26
Supplement: pone.0089964.s006.pdf [file pone.0089964.s006.pdf]

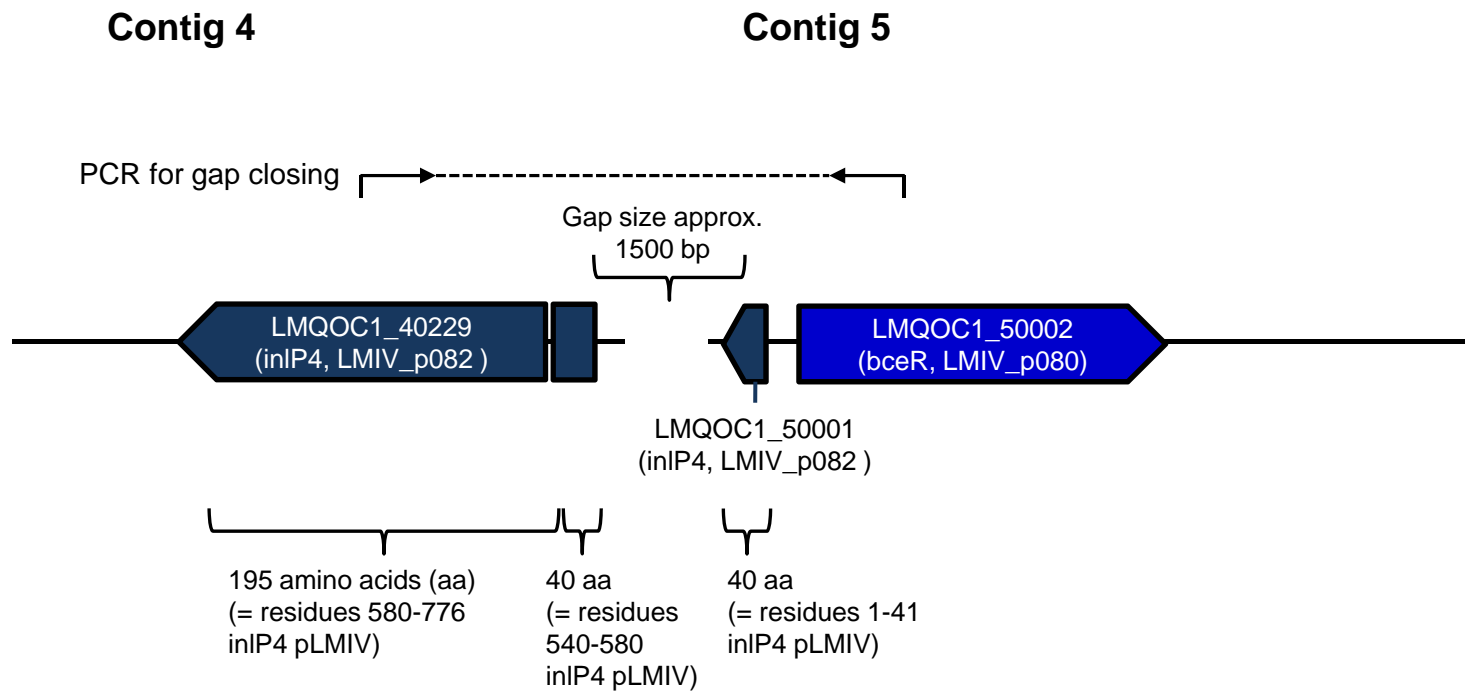

**Figure S6: Genomic region surrounding the gap** between contig 4 and contig 5 in the *L. monocytogenes* QOC1 genome.
