# Supplementary material for: Genome Sequencing of Listeria monocytogenes “Quargel” Listeriosis Outbreak Strains Reveals Two Different Strains with Distinct In Vitro Virulence Potential
Source: PubMed Central journal article supplement (PMC3935953; doi:10.1371/journal.pone.0089964), 2014-02-26
Supplement: pone.0089964.s007.pdf [file pone.0089964.s007.pdf]

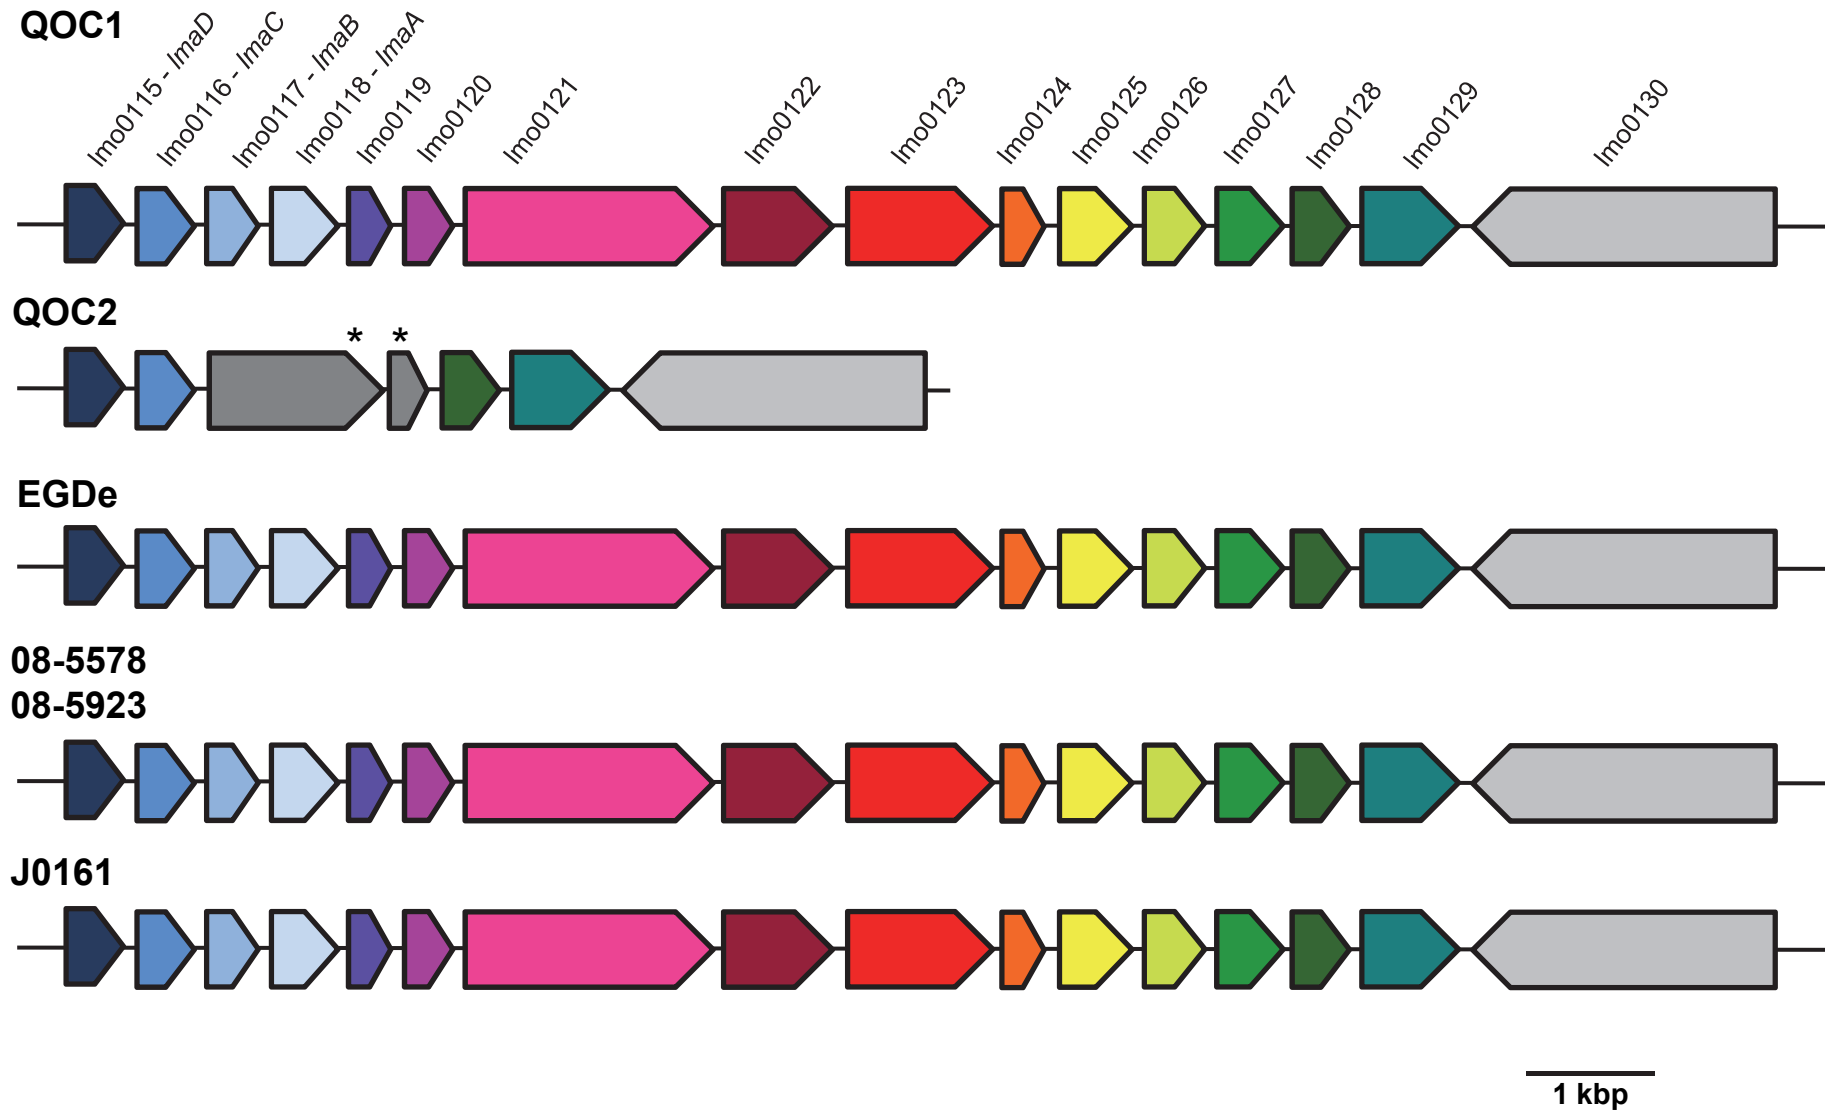

**Figure S7: Organization of the monocolin region/lmaDCBA locus in *L. monocytogenes* serovar 1/2a outbreak strains.** Homologous proteins are shown in the same color. *L. monocytogenes* EGDe locus\_tags are indicated in the top row.

\*pseudogene
