# Supplementary material for: Genome Sequencing of Listeria monocytogenes “Quargel” Listeriosis Outbreak Strains Reveals Two Different Strains with Distinct In Vitro Virulence Potential
Source: PubMed Central journal article supplement (PMC3935953; doi:10.1371/journal.pone.0089964), 2014-02-26
Supplement: pone.0089964.s008.pdf [file pone.0089964.s008.pdf]

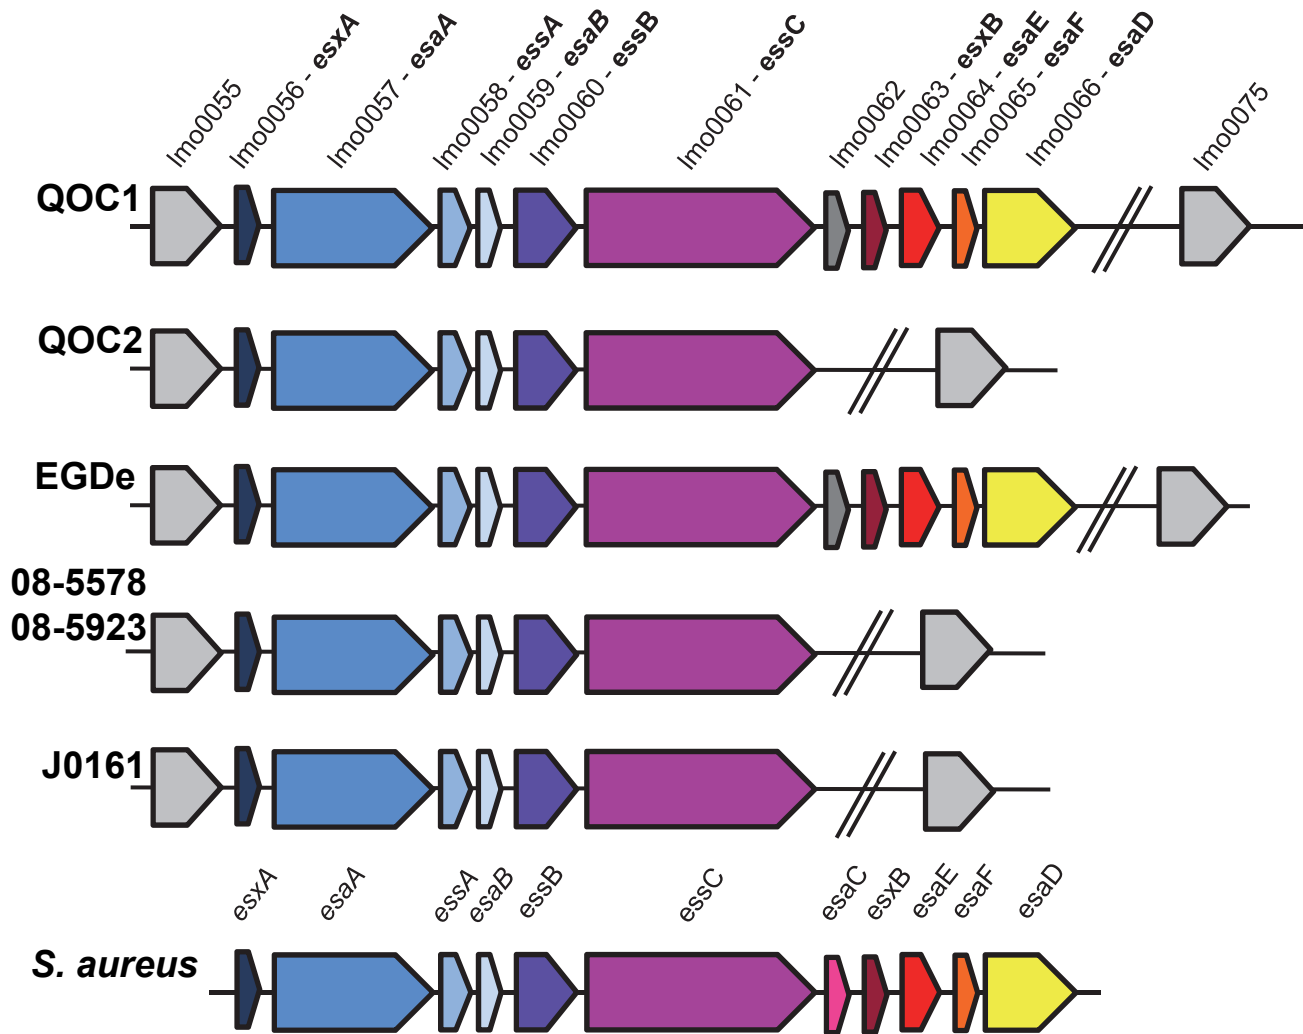

**Figure S8: Genomic organization of the putative WSS/type VII secretion system**

in *L. monocytogenes* serovar 1/2a outbreak strains. Homologous proteins are shown in the same color. *L. monocytogenes* EGDe locus\_tags are indicated in the top row. The functionally characterized WSS/type VII secretion system of *Staphylococcus aureus* is shown at the bottom.
