# Supplementary material for: Genome Sequencing of Listeria monocytogenes “Quargel” Listeriosis Outbreak Strains Reveals Two Different Strains with Distinct In Vitro Virulence Potential
Source: PubMed Central journal article supplement (PMC3935953; doi:10.1371/journal.pone.0089964), 2014-02-26
Supplement: pone.0089964.s009.pdf [file pone.0089964.s009.pdf]

**Table S1: Strain-specific proteins of *L. monocytogenes* QOC1 compared with *L. monocytogenes* QOC2**

| Locus_tag    | Length (bp) | Description                                           | Best Blast hit (genbank accession no.)                            | Amino acid identity to best hit |
|--------------|-------------|-------------------------------------------------------|-------------------------------------------------------------------|---------------------------------|
| LMQOC1_20001 | 1590        | Internalin-like protein                               | Internalin P4 <i>L. monocytogenes</i> FSL J1-208 (WP_003740289.1) | 68%                             |
| LMQOC1_20002 | 555         | Conserved membrane protein of unknown function        | <i>lmo0419 L. monocytogenes</i> EGDe (NP_463948.1)                | 41%                             |
| LMQOC1_20109 | 3633        | Hypothetical protein                                  | <i>lse_0678 L. seeligeri</i> SLCC3954 (YP_003463917.1)            | 75%                             |
| LMQOC1_20145 | 555         | Lipoprotein (Lysine rich protein)                     | <i>lmo0303 L. monocytogenes</i> EGDe (NP_463834.1)                | 99%                             |
| LMQOC1_20278 | 2781        | Hypothetical protein                                  | <i>lmo0444 L. monocytogenes</i> EGDe (NP_463973.1)                | 99%                             |
| LMQOC1_20279 | 1488        | Hypothetical protein                                  | <i>lmo0445 L. monocytogenes</i> EGDe (NP_463974.1)                | 99%                             |
| LMQOC1_20280 | 990         | Choloylglycine hydrolase                              | <i>lmo0446 L. monocytogenes</i> EGDe (NP_463975.1)                | 99%                             |
| LMQOC1_20294 | 120         | Hypothetical protein                                  | <i>L. monocytogenes</i> F6900 (WP_003733942.1)                    | 100%                            |
| LMQOC1_20295 | 1539        | Putative transcriptional regulator                    | <i>lmo0459 L. monocytogenes</i> EGDe (NP_463988.1)                | 99%                             |
| LMQOC1_20296 | 2070        | Conserved domain protein                              | <i>lmo0460 L. monocytogenes</i> EGDe (NP_463989.1)                | 92%                             |
| LMQOC1_20297 | 474         | Hypothetical protein                                  | <i>LMOF2365_0496 L. monocytogenes</i> F2365 (YP_013102.1)         | 99%                             |
| LMQOC1_20298 | 486         | Hypothetical protein                                  | <i>LMOSLCC2755_2081 L. monocytogenes</i> SLCC2755 (CBY49673)      | 100%                            |
| LMQOC1_20299 | 306         | Cell wall surface anchor family protein               | <i>L. monocytogenes</i> J2-064 (YP_008276409)                     | 98%                             |
| LMQOC1_20300 | 267         | Putative transposase orfa, IS3 family                 | <i>lmo0464 L. monocytogenes</i> EGDe (NP_463993.1)                | 98%                             |
| LMQOC1_20301 | 159         | Hypothetical protein                                  | <i>L. monocytogenes</i> FSL R2-561 (YP_005967382.1)               | 100%                            |
| LMQOC1_20302 | 1734        | Hypothetical protein                                  | <i>lmo0466 L. monocytogenes</i> EGDe (NP_463995.1)                | 98%                             |
| LMQOC1_20303 | 1857        | Hypothetical protein                                  | <i>L. seeligeri</i> (WP_003753995)                                | 35%                             |
| LMQOC1_20304 | 1002        | Hypothetical protein                                  | <i>Enterococcus faecalis</i> (WP_002404521)                       | 29%                             |
| LMQOC1_20305 | 621         | Site specific recombinase/invertase, resolvase family | <i>LMOG_02499 L. monocytogenes</i> J0161 (YP_005964303)           | 98%                             |
| LMQOC1_20306 | 924         | Hypothetical protein                                  | <i>lse_0550 L. seeligeri</i> SLCC3954 (YP_003463789.1)            | 57%                             |
| LMQOC1_30002 | 156         | Hypothetical protein                                  | <i>lmo0473 L. monocytogenes</i> EGDe (YP_008475630.1)             | 100%                            |
| LMQOC1_30600 | 126         | Hypothetical protein                                  | <i>LMIG_02264 L. monocytogenes</i> FSL N3-165 (EEW14149)          | 100%                            |
| LMQOC1_30648 | 2376        | UvrD/REP helicase family protein                      | <i>L. monocytogenes</i> J2-064 (YP_008275427.1)                   | 98%                             |

|              |      |                                                                         |                                                                  |      |
|--------------|------|-------------------------------------------------------------------------|------------------------------------------------------------------|------|
| LMQOC1_30649 | 3288 | Hypothetical protein                                                    | <i>L. innocua</i> FSL J1-023 (EFR94265.1)                        | 92%  |
| LMQOC1_30650 | 294  | Hypothetical protein                                                    | <i>Enterococcus gilvus</i> ATCC BAA-350 (WP_010779030)           | 40%  |
| LMQOC1_30651 | 66   | Hypothetical protein                                                    | No hits                                                          |      |
| LMQOC1_30652 | 231  | Hypothetical protein                                                    | UKC_00581 <i>Enterococcus gilvus</i> ATCC BAA-350 (EOI58508)     | 35%  |
| LMQOC1_30653 | 174  | Hypothetical protein                                                    | <i>L. monocytogenes</i> (WP_009929209)                           | 68%  |
| LMQOC1_30654 | 3579 | Hypothetical protein                                                    | WOQ_02569 <i>Enterococcus faecalis</i> EnGen0340 (EOJ96761)      | 38%  |
| LMQOC1_30655 | 357  | Glyoxalase family protein                                               | <i>LMOf2365_1111 L. monocytogenes</i> F2365 (YP_013711)          | 94%  |
| LMQOC1_30663 | 438  | Hypothetical protein                                                    | <i>LMIG_02443 L. monocytogenes</i> FSL N3-165 (EEW14203)         | 92%  |
| LMQOC1_31198 | 363  | Hypothetical protein                                                    | <i>lmo1648 L. monocytogenes</i> EGDe (NP_465173.1)               | 100% |
| LMQOC1_40033 | 1284 | Hypothetical protein                                                    | <i>LMIG_02926 L. monocytogenes</i> FSL N3-165 (EEW14910)         | 99%  |
| LMQOC1_40229 | 588  | Internalin P4                                                           | <i>LMIV_p082 L. monocytogenes</i> FSL J1-208 (EHY61417)          | 96%  |
| LMQOC1_50001 | 150  | Internalin P4                                                           | <i>LMIV_p082 L. monocytogenes</i> FSL J1-208 (EHY61417)          | 90%  |
| LMQOC1_50002 | 669  | Two-component response regulator bcer                                   | <i>LMIV_p080 L. monocytogenes</i> FSL J1-208 (EHY61415)          | 99%  |
| LMQOC1_50003 | 333  | Protein of unknown function                                             | No hits                                                          |      |
| LMQOC1_50004 | 1014 | Sensor histidine kinase bces                                            | <i>LMIV_p079 L. monocytogenes</i> pLMIV FSL J1-208 (EHY61414)    | 98%  |
| LMQOC1_50005 | 768  | ABC transporter (ATP-binding protein); efflux of cationic peptides bcea | <i>LMIV_p078 L. monocytogenes</i> pLMIV FSL J1-208 (EHY61413)    | 99%  |
| LMQOC1_50006 | 2031 | ABC transporter, permease protein bceb                                  | <i>LMIV_p077 L. monocytogenes</i> pLMIV FSL J1-208 (EHY61412)    | 100% |
| LMQOC1_50007 | 876  | Peptidase family M23 protein                                            | <i>LMIV_p074 L. monocytogenes</i> pLMIV FSL J1-208 (EHY61409)    | 99%  |
| LMQOC1_50008 | 954  | Alpha/beta hydrolase fold protein                                       | <i>LMIV_p073 L. monocytogenes</i> pLMIV FSL J1-208 (EHY61408)    | 98%  |
| LMQOC1_50009 | 528  | Acrr family transcriptional regulator                                   | <i>LMIV_p072 L. monocytogenes</i> pLMIV FSL J1-208 (EHY61407)    | 98%  |
| LMQOC1_50010 | 153  | Conserved protein of unknown function                                   | <i>LMIV_p071 L. monocytogenes</i> pLMIV FSL J1-208 (EHY61406)    | 97%  |
| LMQOC1_50011 | 1746 | Leucine-rich repeat domain protein (LPXTG motif)                        | <i>LMOSLCC2540_2112 L. monocytogenes</i> SLCC2540 (YP_006679655) | 96%  |
| LMQOC1_50012 | 366  | Transposase                                                             | <i>LMIV_p069 L. monocytogenes</i> pLMIV FSL J1-208 (EHY61404)    | 95%  |
| LMQOC1_50013 | 267  | Transposase                                                             | <i>LMIV_p068 L. monocytogenes</i> pLMIV FSL J1-208 (EHY61403)    | 95%  |
| LMQOC1_50014 | 3612 | Internalin P3                                                           | <i>LMIV_p067 L. monocytogenes</i> pLMIV FSL J1-208 (EHY61402)    | 94%  |

|               |      |                                                |                                                                  |      |
|---------------|------|------------------------------------------------|------------------------------------------------------------------|------|
| LMQOC1_50015  | 1368 | Conserved protein of unknown function          | <i>LMOSLCC2540_2116 L. monocytogenes</i> SLCC2540 (YP_006679659) | 96%  |
| LMQOC1_50016* | 327  | Internalin P2                                  | <i>LMIV_p064 L. monocytogenes</i> pLMIV FSL J1-208 (EHY61399)    | 83%  |
| LMQOC1_50017  | 267  | Transposase                                    | <i>LMIV_p063 L. monocytogenes</i> pLMIV FSL J1-208 (EHY61398)    | 97%  |
| LMQOC1_50018  | 1521 | Internalin P1                                  | <i>LMIV_p063 L. monocytogenes</i> pLMIV FSL J1-208 (EHY61398)    | 82%  |
| LMQOC1_50019  | 555  | Hypothetical protein                           | <i>Imo0419 L. monocytogenes</i> EGDe (NP_463948.1)               | 41%  |
| LMQOC1_50020  | 135  | Hypothetical protein                           | No hits                                                          |      |
| LMQOC1_60203  | 2622 | Putative atpase                                | Q9I_00731 <i>Enterococcus faecalis</i> EnGen0074 (EOE00066)      | 66%  |
| LMQOC1_60530  | 399  | Esac protein                                   | <i>Imo0062 L. monocytogenes</i> EGDe (NP_463595)                 | 100% |
| LMQOC1_60531  | 300  | Esxb protein                                   | <i>Imo0063 L. monocytogenes</i> EGDe (NP_463596)                 | 100% |
| LMQOC1_60532  | 702  | Esae protein                                   | <i>Imo0064 L. monocytogenes</i> EGDe (NP_463597)                 | 100% |
| LMQOC1_60533  | 333  | Esaf protein                                   | <i>Imo0065 L. monocytogenes</i> EGDe (NP_463598)                 | 100% |
| LMQOC1_60534  | 1839 | Esad protein                                   | <i>Imo0066 L. monocytogenes</i> EGDe (NP_463599)                 | 89%  |
| LMQOC1_60535  | 468  | Hypothetical protein                           | <i>HPL003_27375 Paenibacillus terrae</i> HPL-003 (YP_005078410)  | 58%  |
| LMQOC1_60547  | 1008 | Hypothetical protein                           | <i>LM5578_2950 L. monocytogenes</i> 08-5578 (YP_003415058.1)     | 98%  |
| LMQOC1_60548  | 558  | Putative lipoprotein                           | <i>LM5578_2949 L. monocytogenes</i> 08-5578 (YP_003415057.1)     | 99%  |
| LMQOC1_60549  | 456  | Hypothetical protein                           | <i>LM5578_2948 L. monocytogenes</i> 08-5578 (YP_003415056.1)     | 98%  |
| LMQOC1_60550  | 426  | Hypothetical protein                           | <i>LM5578_2947 L. monocytogenes</i> 08-5578 (YP_003415055.1)     | 99%  |
| LMQOC1_60551  | 204  | Predicted protein                              | <i>LMMG_03026 L. monocytogenes</i> F6900 (EEW22779)              | 100% |
| LMQOC1_60552  | 135  | Hypothetical protein                           | <i>LMMG_03027 L. monocytogenes</i> F6900 (EEW22780)              | 100  |
| LMQOC1_60554  | 729  | Conserved membrane protein of unknown function | <i>LMMG_03027 L. monocytogenes</i> F6900 (EEW22787)              | 99%  |
| LMQOC1_60606  | 390  | Listeria protein Imab                          | <i>LM5578_2901 L. monocytogenes</i> 08-5578 (YP_003415009.1)     | 99%  |
| LMQOC1_60607  | 513  | Listeria protein Imaa                          | <i>LM5578_2900 L. monocytogenes</i> 08-5578 (YP_003415008.1)     | 100% |
| LMQOC1_60608  | 303  | Hypothetical protein                           | <i>Imo0119 L. monocytogenes</i> EGDe (NP_463652.1)               | 100% |
| LMQOC1_60609  | 405  | Hypothetical protein                           | <i>Imo0120 L. monocytogenes</i> EGDe (NP_463653.1)               | 99%  |
| LMQOC1_60610  | 1869 | Phage tail length tape-measure protein         | <i>Imo0121 L. monocytogenes</i> EGDe (NP_463654.1)               | 99%  |

|              |      |                             |                                                                       |      |
|--------------|------|-----------------------------|-----------------------------------------------------------------------|------|
| LMQOC1_60611 | 819  | Phage tail fiber            | <i>LMRG_02371 L. monocytogenes</i> 10403S (YP_005961270)              | 100% |
| LMQOC1_60612 | 1137 | Minor structural protein    | <i>LMRG_02372 L. monocytogenes</i> 10403S (YP_005961271)              | 99%  |
| LMQOC1_60613 | 300  | Hypothetical protein        | <i>Imo0124 L. monocytogenes</i> EGDe (NP_463657.1)                    | 100% |
| LMQOC1_60614 | 576  | Hypothetical protein        | <i>Imo0125 L. monocytogenes</i> EGDe (NP_463658.1)                    | 99%  |
| LMQOC1_60615 | 480  | Hypothetical protein        | <i>Imo0126 L. monocytogenes</i> EGDe (NP_463659.1)                    | 100% |
| LMQOC1_60616 | 537  | Hypothetical protein        | <i>Imo0127 L. monocytogenes</i> EGDe (NP_463660.1)                    | 100% |
| LMQOC1_70001 | 549  | Hypothetical protein        | No hits                                                               |      |
| LMQOC1_70002 | 246  | Hypothetical protein        | P70_0013 <i>Listeria</i> phage P70 (YP_006905878)                     | 52%  |
| LMQOC1_70003 | 477  | Hypothetical protein        | LPLH_ORF168 <i>Lactobacillus</i> phage LL-H (YP_001285879)            | 38%  |
| LMQOC1_70004 | 420  | Protein of unknown function | No hits                                                               |      |
| LMQOC1_70005 | 342  | Hypothetical protein        | Head-tail connector P70_0014 <i>Listeria</i> phage P70 (YP_006905879) | 51%  |
| LMQOC1_70006 | 981  | Hypothetical protein        | <i>Listeria grayi</i> (WP_003755391)                                  | 39%  |
| LMQOC1_70007 | 243  | Protein of unknown function | No hits                                                               |      |
| LMQOC1_70008 | 186  | Protein of unknown function | <i>Paenibacillus elgii</i> (WP_010498411)                             | 39%  |
| LMQOC1_70009 | 102  | Hypothetical protein        | No hits                                                               |      |
| LMQOC1_70010 | 303  | Hypothetical protein        | No hits                                                               |      |
| LMQOC1_70011 | 252  | Hypothetical protein        | No hits                                                               |      |
| LMQOC1_70012 | 276  | Hypothetical protein        | No hits                                                               |      |
| LMQOC1_70013 | 300  | Hypothetical protein        | No hits                                                               |      |
| LMQOC1_70014 | 174  | Hypothetical protein        | No hits                                                               |      |

\* Putative pseudogene
