# Supplementary material for: Genome Sequencing of Listeria monocytogenes “Quargel” Listeriosis Outbreak Strains Reveals Two Different Strains with Distinct In Vitro Virulence Potential
Source: PubMed Central journal article supplement (PMC3935953; doi:10.1371/journal.pone.0089964), 2014-02-26
Supplement: pone.0089964.s010.pdf [file pone.0089964.s010.pdf]

**Table S2: Presence of 81 virulence-associated genes in *L. monocytogenes* Quargel outbreak strains**

| <b>Gene designation</b> | <b>EGDe homologue</b> | <b>presence in<br/><i>L. monocytogenes</i> QOC1<br/>(% amino acid identity)</b> | <b>presence in<br/><i>L. monocytogenes</i> QOC2<br/>(% amino acid identity)</b> |
|-------------------------|-----------------------|---------------------------------------------------------------------------------|---------------------------------------------------------------------------------|
| <i>agrA</i>             | lmo0051               | 100,0                                                                           | 100,0                                                                           |
| <i>ctaP</i>             | lmo0135               | 99,6                                                                            | 99,6                                                                            |
| <i>prfA</i>             | lmo0200               | 100,0                                                                           | 100,0                                                                           |
| <i>plcA</i>             | lmo0201               | 99,1                                                                            | 98,4                                                                            |
| <i>hly</i>              | lmo0202               | 100,0                                                                           | 99,8                                                                            |
| <i>mpl</i>              | lmo0203               | 99,6                                                                            | 99,6                                                                            |
| <i>actA</i>             | lmo0204               | 95,3                                                                            | 95,3                                                                            |
| <i>plcB</i>             | lmo0205               | 99,7                                                                            | 99,7                                                                            |
| <i>lmo0206</i>          | lmo0206               | 98,1                                                                            | 98,1                                                                            |
| <i>ctsR</i>             | lmo0229               | 100,0                                                                           | 100,0                                                                           |
| <i>lmo0257</i>          | lmo0257               | 100,0                                                                           | 95,9                                                                            |
| <i>inIH/inIC2</i>       | lmo0263               | 96,4                                                                            | 97,5                                                                            |
| <i>htrA</i>             | lmo0292               | 100,0                                                                           | 100,0                                                                           |
| <i>vip</i>              | lmo0320               | no hit                                                                          | 99,5                                                                            |
| <i>pgdA</i>             | lmo0415               | 99,8                                                                            | 99,8                                                                            |
| <i>inIA</i>             | lmo0433               | 98,4                                                                            | 99,0                                                                            |
| <i>inIB</i>             | lmo0434               | 99,5                                                                            | 99,4                                                                            |
| <i>IntA</i>             | lmo0438               | 99,5                                                                            | 88,8                                                                            |
| <i>lmo0540</i>          | lmo0540               | 99,8                                                                            | 99,8                                                                            |
| <i>iap</i>              | lmo0582               | 99,8                                                                            | 99,0                                                                            |
| <i>secA2</i>            | lmo0583               | 99,7                                                                            | 99,6                                                                            |
| <i>lmo0604</i>          | lmo0604               | 100,0                                                                           | 100,0                                                                           |
| <i>mogR</i>             | lmo0674               | 100,0                                                                           | 100,0                                                                           |
| <i>lmo0788</i>          | lmo0788               | 99,9                                                                            | 99,8                                                                            |
| <i>uhpT</i>             | lmo0838               | 98,1                                                                            | 98,7                                                                            |
| <i>sigB</i>             | lmo0895               | 100,0                                                                           | 100,0                                                                           |
| <i>lmo0915</i>          | lmo0915               | 100,0                                                                           | 100,0                                                                           |
| <i>lplA1</i>            | lmo0931               | 100,0                                                                           | 100,0                                                                           |
| <i>fri</i>              | lmo0943               | 100,0                                                                           | 100,0                                                                           |
| <i>dltA</i>             | lmo0974               | 100,0                                                                           | 100,0                                                                           |
| <i>aut</i>              | lmo1076               | 100,0                                                                           | 100,0                                                                           |
| <i>lmo1081</i>          | lmo1081               | 100,0                                                                           | 100,0                                                                           |
| <i>lmo1082</i>          | lmo1082               | 100,0                                                                           | 100,0                                                                           |
| <i>lmo1099</i>          | lmo1099               | no hit                                                                          | no hit                                                                          |
| <i>lmo1102</i>          | lmo1102               | 31,1                                                                            | 31,1                                                                            |
| <i>tig</i>              | lmo1267               | 100,0                                                                           | 100,0                                                                           |
| <i>sipX</i>             | lmo1269               | 99,5                                                                            | 100,0                                                                           |
| <i>sipZ</i>             | lmo1271               | 99,4                                                                            | 99,4                                                                            |
| <i>inIK</i>             | lmo1290               | 100,0                                                                           | 97,9                                                                            |
| <i>oat</i>              | lmo1291               | 99,7                                                                            | 99,5                                                                            |
| <i>hfq</i>              | lmo1295               | 100,0                                                                           | 100,0                                                                           |
| <i>tcsA</i>             | lmo1388               | 99,7                                                                            | 99,7                                                                            |

|                |         |       |       |
|----------------|---------|-------|-------|
| <i>bilE</i>    | lmo1421 | 100,0 | 100,0 |
| <i>lmo1438</i> | lmo1438 | 99,9  | 99,9  |
| <i>sod</i>     | lmo1439 | 100,0 | 100,0 |
| <i>lmo1521</i> | lmo1521 | 100,0 | 100,0 |
| <i>relA</i>    | lmo1523 | 100,0 | 100,0 |
| <i>lmo1601</i> | lmo1601 | 100,0 | 100,0 |
| <i>lmo1602</i> | lmo1602 | 100,0 | 100,0 |
| <i>perR</i>    | lmo1683 | 100,0 | 100,0 |
| <i>mprF</i>    | lmo1695 | 100,0 | 99,8  |
| <i>adeC</i>    | lmo1742 | 99,7  | 99,7  |
| <i>virR</i>    | lmo1745 | 100,0 | 100,0 |
| <i>inlC</i>    | lmo1786 | 99,7  | 99,7  |
| <i>stp</i>     | lmo1821 | 100,0 | 100,0 |
| <i>fbpA</i>    | lmo1829 | 99,5  | 99,7  |
| <i>lmo1855</i> | lmo1855 | 100,0 | 100,0 |
| <i>fur</i>     | lmo1956 | 100,0 | 100,0 |
| <i>lmo2026</i> | lmo2026 | 91,2  | 99,7  |
| <i>lmo2048</i> | lmo2048 | 99,4  | 99,4  |
| <i>bsh</i>     | lmo2067 | 99,7  | 100,0 |
| <i>lmo2114</i> | lmo2114 | 100,0 | 100,0 |
| <i>lmo2115</i> | lmo2115 | 100,0 | 100,0 |
| <i>dacA</i>    | lmo2120 | 100,0 | 100,0 |
| <i>lmo2157</i> | lmo2157 | 99,8  | 99,7  |
| <i>lmo2177</i> | lmo2177 | 100,0 | 100,0 |
| <i>svpA</i>    | lmo2185 | 100,0 | 99,8  |
| <i>oppA</i>    | lmo2196 | 99,8  | 99,8  |
| <i>fabF</i>    | lmo2201 | 100,0 | 100,0 |
| <i>lmo2203</i> | lmo2203 | 99,5  | 99,5  |
| <i>clpB</i>    | lmo2206 | 99,9  | 99,9  |
| <i>prsA2</i>   | lmo2219 | 99,7  | 99,7  |
| <i>lmo2439</i> | lmo2439 | 100,0 | 100,0 |
| <i>gap</i>     | lmo2459 | 100,0 | 100,0 |
| <i>degU</i>    | lmo2515 | 100,0 | 100,0 |
| <i>lmo2522</i> | lmo2522 | 99,6  | 100,0 |
| <i>ami</i>     | lmo2558 | 99,7  | 95,3* |
| <i>murA</i>    | lmo2691 | 99,3  | 99,7  |
| <i>lmo2713</i> | lmo2713 | 99,7  | 100,0 |
| <i>lmo2714</i> | lmo2714 | 100,0 | 99,7  |
| <i>inlJ</i>    | lmo2821 | 98,6  | 97,3  |

\*putative pseudogene (truncated)

The list of virulence genes is based on Den Bakker et al. BMC Genomics. 2010 Dec 2;11:688.
