# Supplementary material for: Genome Sequencing of Listeria monocytogenes “Quargel” Listeriosis Outbreak Strains Reveals Two Different Strains with Distinct In Vitro Virulence Potential
Source: PubMed Central journal article supplement (PMC3935953; doi:10.1371/journal.pone.0089964), 2014-02-26
Supplement: pone.0089964.s011.pdf [file pone.0089964.s011.pdf]

**Table S3: Strain-specific proteins of *L. monocytogenes* QOC2 compared with *L. monocytogenes* QOC1**

| Locus_tag     | Length [bp] | Description                                          | Best Blast hit                                                         | Amino acid identity to best hit |
|---------------|-------------|------------------------------------------------------|------------------------------------------------------------------------|---------------------------------|
| LMQOC2_40206  | 360         | Putative lipoprotein                                 | <i>LMLG_1212 L. monocytogenes</i> Finland 1998 (YP_005972342)          | 99%                             |
| LMQOC2_40207  | 123         | Protein of unknown function                          | No hits                                                                |                                 |
| LMQOC2_40208  | 870         | Putative lipoprotein                                 | <i>lmo2595 L. monocytogenes</i> EGDe (NP_466118.1)                     | 100%                            |
| LMQOC2_40270  | 1392        | Putative dntp triphosphohydrolase                    | <i>LMOG_01851 L. monocytogenes</i> J0161 (YP_005966720)                | 100%                            |
| LMQOC2_40537  | 318         | Conserved protein of unknown function                | <i>LMRG_02492 L. monocytogenes</i> 10403S (YP_005961215)               | 99%                             |
| LMQOC2_40538  | 435         | Conserved protein of unknown function                | <i>LMOh7858_0077 L. monocytogenes</i> H7858 (EAL10133)                 | 99%                             |
| LMQOC2_40539  | 309         | Conserved protein of unknown function                | <i>LMRG_02494 L. monocytogenes</i> 10403S (YP_005961217)               | 100%                            |
| LMQOC2_40542  | 276         | Conserved protein of unknown function                | <i>LMOh7858_0087 L. monocytogenes</i> H7858 (EAL10143)                 | 100%                            |
| LMQOC2_40543  | 714         | Conserved protein of unknown function                | <i>LMOh7858_0088 L. monocytogenes</i> H7858 (EAL10144)                 | 100%                            |
| LMQOC2_40547  | 408         | Conserved protein of unknown function                | <i>BN424_1238 Carnobacterium maltaromaticum</i> LMA28 (CCO10735)       | 49%                             |
| LMQOC2_40550  | 294         | Conserved protein of unknown function                | <i>lmo0069 L. monocytogenes</i> EGDe (NP_463602)                       | 98%                             |
| LMQOC2_40603* | 204         | Protein of unknown function                          | <i>LMHCC_2507 L. monocytogenes</i> HCC23 (ACK40842))                   | 100%                            |
| LMQOC2_40604* | 1077        | Protein of unknown function                          | <i>LMHCC_2507 L. monocytogenes</i> HCC23 (ACK40842))                   | 99%                             |
| LMQOC2_20106  | 387         | Transcriptional repressor, blai/meci family          | <i>lmo0252 L. monocytogenes</i> EGDe (NP_463783.1)                     | 99%                             |
| LMQOC2_20107  | 1041        | Regulatory sensor-transducer, blar1/mecr1 family     | <i>lmo0253 L. monocytogenes</i> EGDe (NP_463784.1)                     | 99%                             |
| LMQOC2_20108  | 663         | Hypothetical protein                                 | <i>lmo0254 L. monocytogenes</i> EGDe (NP_463785.1)                     | 100%                            |
| LMQOC2_20128  | 2955        | Hypothetical protein, putative ntpase (NACHT family) | <i>LMOSLCC2376_0245 L. monocytogenes</i> SLCC2376 (YP_006689443.1)     | 98%                             |
| LMQOC2_20152  | 1407        | Conserved hypothetical protein, AAA-type atpase      | <i>UKC_01057 Enterococcus gilvus</i> ATCC BAA-350 (EOI56872.1)         | 37%                             |
| LMQOC2_20153  | 519         | Protein of unknown function                          | <i>HMPREF9282_00162 Veillonella ratti</i> ACS-216-V-Col6b (EKU79354.1) | 23%                             |
| LMQOC2_20154  | 876         | Conserved hypothetical protein protein               | <i>HPL003_07175 Paenibacillus terrae</i> HPL-003 (YP_005074421.1)      | 27%                             |
| LMQOC2_20155  | 126         | Hypothetical protein                                 | <i>HMPREF9519_01901 Enterococcus faecalis</i> TX1346 (EFU17174.1)      | 71%                             |
| LMQOC2_20156  | 1239        | Hypothetical protein                                 | <i>lse_0277 L. seeligeri</i> SLCC3954 (YP_003463516.1)                 | 59%                             |
| LMQOC2_20157  | 810         | Hypothetical protein                                 | <i>HMPREF9505_00770 Enterococcus faecalis</i> TX0109 (EFM70909.1)      | 39%                             |
| LMQOC2_20165  | 2652        | Putative DNA/RNA helicase                            | <i>LMOSLCC7179_0296 L. monocytogenes</i> SLCC7179 (YP_006697989.1)     | 99%                             |
| LMQOC2_20166  | 933         | 5'-nucleotidase                                      | <i>LMFG_00788 L. monocytogenes</i> FSL J2-071 (EFD91373.1))            | 100%                            |

|              |      |                                                          |                                                                    |      |
|--------------|------|----------------------------------------------------------|--------------------------------------------------------------------|------|
| LMQOC2_20176 | 1200 | Cell wall surface anchor family protein                  | <i>lmo0320 (vip) L. monocytogenes</i> EGDe (NP_463850.1)           | 99%  |
| LMQOC2_20229 | 1188 | Membrane protein of unknown function                     | <i>Enterococcus faecalis</i> (WP_010709719.1)                      | 30%  |
| LMQOC2_20238 | 456  | Hypothetical protein                                     | <i>LMRG_00071 L. monocytogenes</i> 10403S (AEO05392.1)             | 99%  |
| LMQOC2_20302 | 549  | Hypothetical protein                                     | <i>LMOSLCC7179_0432 L. monocytogenes</i> SLCC7179 (CBY59638.1)     | 99%  |
| LMQOC2_20314 | 210  | Hypothetical protein                                     | <i>LMRG_02887 L. monocytogenes</i> 10403S (AEO05470.1)             | 100% |
| LMQOC2_20315 | 546  | Hypothetical protein                                     | <i>LMRG_00151 L. monocytogenes</i> 10403S (AEO05471.1)             | 99%  |
| LMQOC2_20366 | 489  | CRISPR-associated recb family exonuclease Cas4a          | <i>M642_15185 L. monocytogenes</i> C1-387 (AGR03388)               | 99%  |
| LMQOC2_20468 | 534  | Acetyltransferase, GNAT family                           | <i>lmo0614 L. monocytogenes</i> EGDe (NP_464141.1)                 | 99%  |
| LMQOC2_20645 | 1974 | Cell wall surface anchor family protein (LPXTG motif)    | <i>LMOF6854_0833 L. monocytogenes</i> F6854 (WP_003723802.1)       | 99%  |
| LMQOC2_20962 | 678  | Hypothetical protein, putative transcriptional regulator | <i>LMOSLCC2376_1068 L. monocytogenes</i> SLCC2376 (CBY63100.1)     | 96%  |
| LMQOC2_20963 | 702  | Hypothetical protein, putative DNA binding protein       | <i>LMOSLCC2376_1069 L. monocytogenes</i> SLCC2376 (CBY63101.1)     | 96%  |
| LMQOC2_20964 | 810  | Hypothetical protein                                     | <i>LMBG_00132 L. monocytogenes</i> FSL J1-194 (EFG00615)           | 99%  |
| LMQOC2_20971 | 504  | Hypothetical protein                                     | <i>LMHCC_1530 L. monocytogenes</i> HCC23 (YP_002350488.1)          | 99%  |
| LMQOC2_20972 | 306  | Hypothetical protein                                     | <i>LMOF6854_1160 L. monocytogenes</i> F6854 (EAL07611.1)           | 100% |
| LMQOC2_20973 | 474  | Hypothetical protein                                     | <i>LMOF6854_1159 L. monocytogenes</i> F6854 (EAL07501)             | 97%  |
| LMQOC2_20974 | 426  | Hypothetical protein                                     | <i>LMOF6854_1161 L. monocytogenes</i> F6854 (EAL07502)             | 96%  |
| LMQOC2_21040 | 153  | Hypothetical protein                                     | <i>HMPREF0557_01844 L. innocua</i> ATCC 33091 (EHN61104.1)         | 76%  |
| LMQOC2_30208 | 105  | Hypothetical protein                                     | <i>LMOSLCC2372_2071 L. monocytogenes</i> SLCC2372 (YP_006685398.1) | 97%  |
| LMQOC2_30306 | 441  | Hypothetical protein                                     | <i>LMRG_01254 L. monocytogenes</i> 10403S (YP_005963216)           | 100% |
| LMQOC2_30307 | 672  | Hypothetical protein                                     | <i>LMRG_01255 L. monocytogenes</i> 10403S (YP_005963217)           | 100% |

\* putative pseudogenes, probable split gene
